# Supplementary material for: Preparation of Fe3O4@polyoxometalates Nanocomposites and Their Efficient Adsorption of Cationic Dyes from Aqueous Solution
Source: PubMed Central journal article supplement (PMC6523850; doi:10.3390/nano9040649), 2019-04-23
Supplement: nanomaterials-09-00649-s001.pdf [file nanomaterials-09-00649-s001.pdf]

Supporting Information

# Preparation of $\text{Fe}_3\text{O}_4$ @polyoxometalates Nanocomposites and Their Efficient Adsorption of Cationic Dyes from Aqueous Solution

Jie Li, Haiyan Zhao, Chenguang Ma, Qiuxia Han, Mingxue Li \* and Hongling Liu \*

Henan Key Laboratory of Polyoxometalates, Institute of Molecular and Crystal Engineering, College of Chemistry and Chemical Engineering, Henan University, Kaifeng 475004, China; hedalj@163.com (J.L.); 15890943739@163.com (H.Z.); 104753160773@vip.henu.edu.cn (C.M.); qiuxia\_han@163.com (Q.H.)

\* Correspondence: limingxue@henu.edu.cn (M.L.), hlliu@henu.edu.cn (H.L.)

Thermogravimetric analyses of  $\text{Fe}_3\text{O}_4$ , **1**, **2**,  $\text{Fe}_3\text{O}_4$ @**1** and  $\text{Fe}_3\text{O}_4$ @**2** were performed under a nitrogen flow (Figure. S1a, b). It turns out that the weight ratio of **1** and **2** in the synthesized nanocomposite is 96.68% and 96.50%, respectively. It should be noted that the loss of  $\text{Fe}_3\text{O}_4$  might be attributed to the loss of its surfactant attached during the synthesis process.

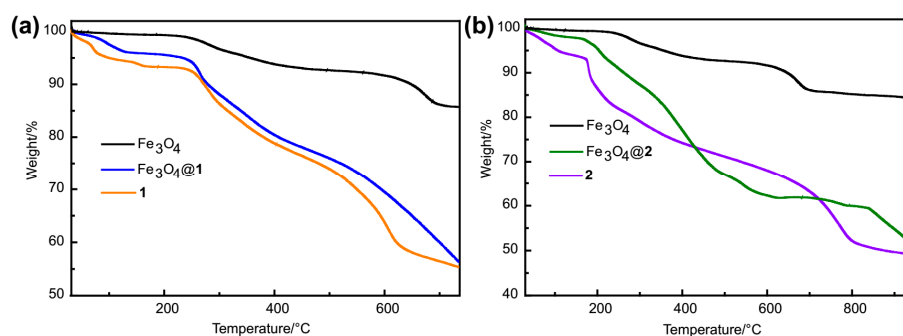

Figure S1. Thermogravimetric analyses of (a)  $\text{Fe}_3\text{O}_4$ @**1** and (b)  $\text{Fe}_3\text{O}_4$ @**2**.
